# Supplementary material for: Pathophysiological mechanisms of bradycardia in patients with anorexia nervosa
Source: PubMed Central journal article supplement (PMC8299991; doi:10.1002/hsr2.331), 2021-07-23
Supplement: HSR2-4-e331-s001.pdf [file HSR2-4-e331-s001.pdf]

## Appendix A

Relationship between pNN50 and IBI in HCN4 mutation carriers

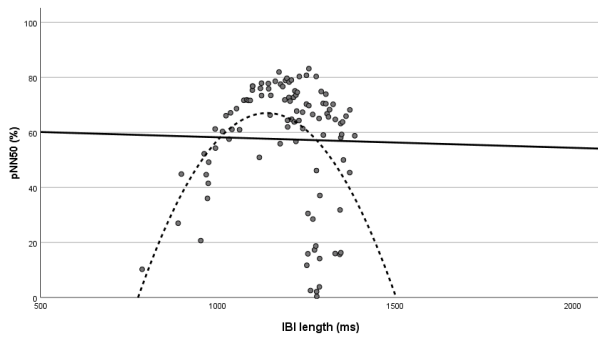

Relationship between pNN50 and IBI in a 27-year-old patient carrying the HCN4 c.1737+1G>T mutation. (Quadratic function:  $pNN50 = 1.154 \times IBI^2 - 0.001 \times IBI - 589.530$   $R^2 = .197$ ; linear function:  $pNN50 = -0.004 \times IBI + 62.062$   $R^2 = .000$ )

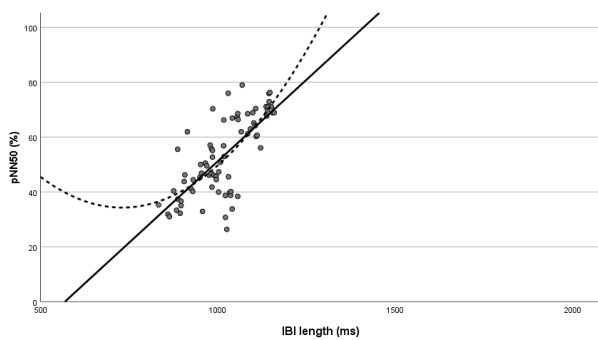

Relationship between pNN50 and IBI in a 23-year-old female patient carrying the HCN4 c.1737+1G>T mutation. (Quadratic function:  $pNN50 = -0.309 \times IBI^2 + 0.000 \times IBI + 147.054$   $R^2 = .530$ ; linear function:  $pNN50 = 0.119 \times IBI - 67.501$   $R^2 = 0.517$ )

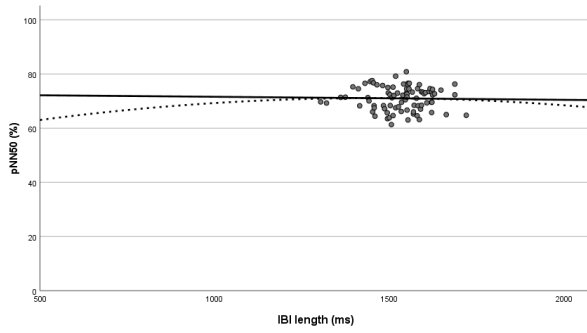

Relationship between pNN50 and IBI in a 13-year-old female patient carrying the HCN4 c.1737+1G>T mutation. (Quadratic function:  $pNN50 = -0.026 \times IBI^2 + 0.000 \times IBI + 52.324$   $R^2 = .001$ ; linear function:  $pNN50 = -0.001 \times IBI + 72.698$   $R^2 = .000$ )

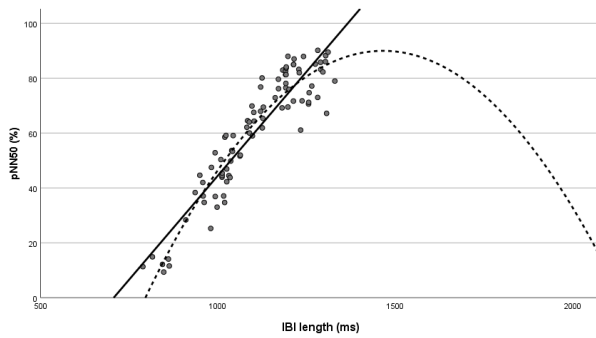

Relationship between pNN50 and IBI in a 22-year-old male patient carrying the HCN4 c.1737+1G>T mutation. pNN50 increases with IBI length. (Quadratic function:  $pNN50 = 0.597 \times IBI^2 - 0.000 \times IBI - 340.154$   $R^2 = .885$ ; linear function:  $pNN50 = .152 \times IBI - 106.99$   $R^2 = .853$ )

### Relationship between pNN50 and IBI in controls

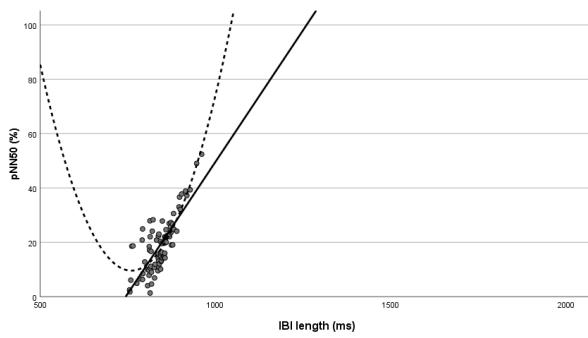

Relationship between pNN50 and IBI in a 12-year old girl. (Quadratic function:  $pNN50 = -1.706 \times IBI^2 - .001 \times IBI + 657.627$   $R^2 = .702$ ; linear function:  $pNN50 = .194 \times IBI - 144.160$   $R^2 = .621$ )

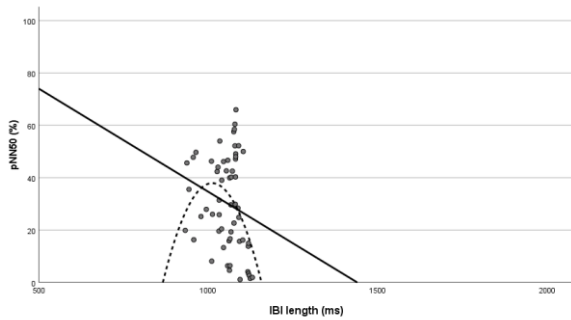

Relationship between pNN50 and IBI in a 13-year old girl. (Quadratic function:  $pNN50 = 3.625 \times IBI^2 - .002 \times IBI + 657.627$   $R^2 = .127$ ; linear function:  $pNN50 = -.079 \times IBI - 113.367$   $R^2 = .046$ )

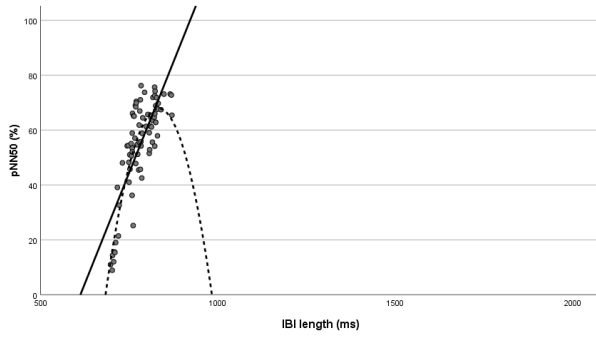

Relationship between pNN50 and IBI in a 14-year old girl. (Quadratic function:  $pNN50 = 5.029 \times IBI^2 - .003 \times IBI - 2025.828$   $R^2 = .746$ ; linear function:  $pNN50 = .323 \times IBI - 197.960$   $R^2 = .615$ )

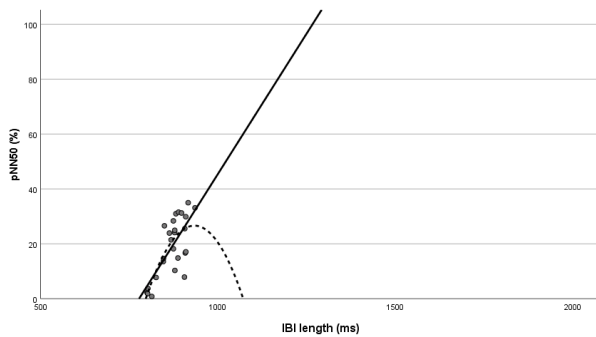

Relationship between pNN50 and IBI in a 14-year old girl. (Quadratic function:  $pNN50 = 2.639 \times IBI^2 - .001 \times IBI - 159.052$   $R^2 = .568$ ; linear function:  $pNN50 = .205 \times IBI - 1204.986$   $R^2 = .531$ )

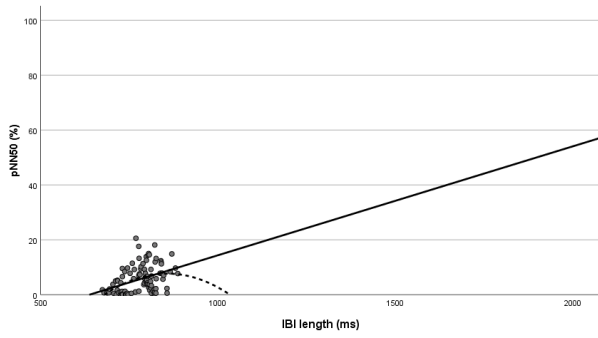

Relationship between pNN50 and IBI in a 13-year old girl. (Quadratic function:  $pNN50 = .421 \times IBI^2 - .000 \times IBI - 172.433$   $R^2 = .174$ ; linear function:  $pNN50 = .040 \times IBI - 25.295$   $R^2 = .157$ )

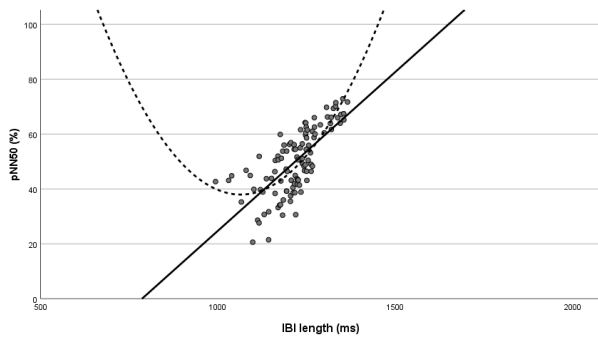

Relationship between pNN50 and IBI in a 16-year old girl. (Quadratic function:  $pNN50 = -.879 \times IBI^2 - .000 \times IBI + 505.549$   $R^2 = .593$ ; linear function:  $pNN50 = .116 \times IBI - 90.938$   $R^2 = .516$ )

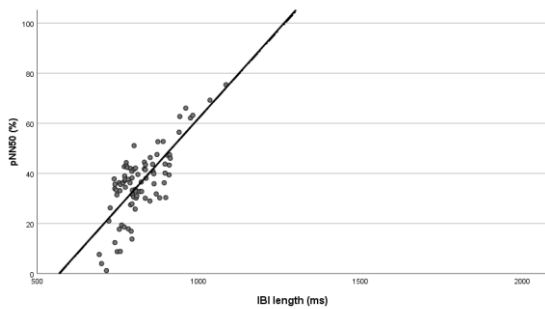

Relationship between pNN50 and IBI in a 16-year old girl. (Quadratic function:  $pNN50 = .148 \times IBI^2 - .000 \times IBI - 91.578$   $R^2 = .585$ ; linear function:  $pNN50 = .144 \times IBI - 81.578$   $R^2 = .585$ )

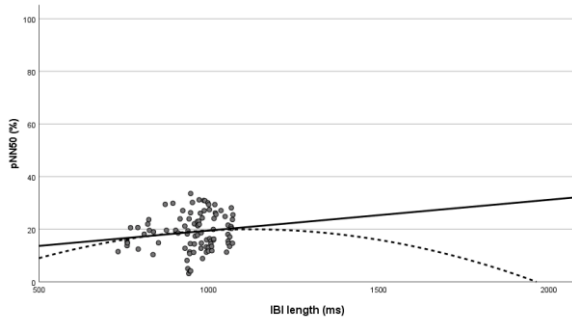

Relationship between pNN50 and IBI in a 13-year old girl. (Quadratic function:  $pNN50 = .063 \times IBI^2 - .000 \times IBI - 15.670$   $R^2 = .022$ ; linear function:  $pNN50 = .012 \times IBI - 7.798$   $R^2 = .021$ )

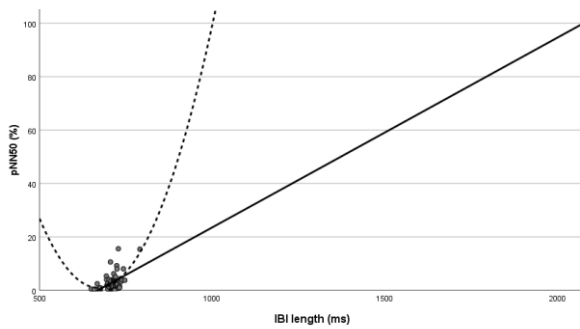

Relationship between pNN50 and IBI in a 13-year old girl. (Quadratic function:  $pNN50 = -1.207 \times IBI^2 - .001 \times IBI - 404.884$   $R^2 = .332$  linear function:  $pNN50 = .071 \times IBI - 47.567$   $R^2 = .248$ )

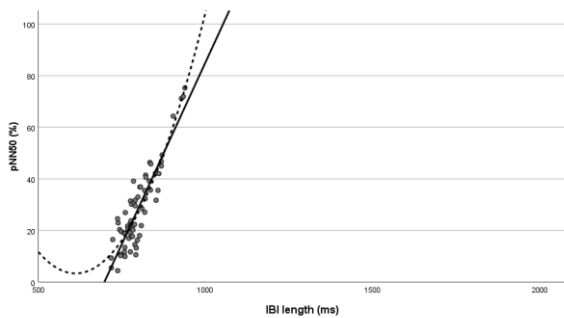

Relationship between pNN50 and IBI in a 14-year old girl. (Quadratic function:  $pNN50 = -.821 \times IBI^2 - .001 \times IBI - 254.187$   $R^2 = .823$  linear function:  $pNN50 = .282 \times IBI - 196.394$   $R^2 = .803$ )

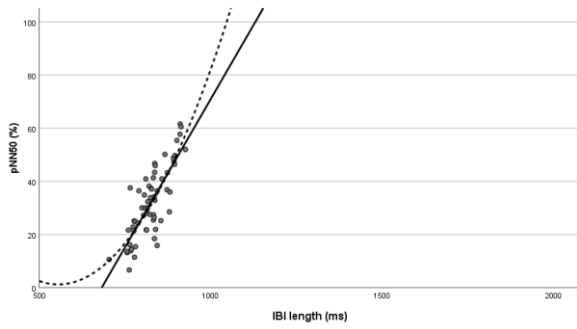

Relationship between pNN50 and IBI in a 12-year old girl. (Quadratic function:  $pNN50 = -.456 \times IBI^2 - .000 \times IBI - 152$ .  $R^2 = .659$  linear function:  $pNN50 = .223 \times IBI - 152.376$   $R^2 = .651$ )

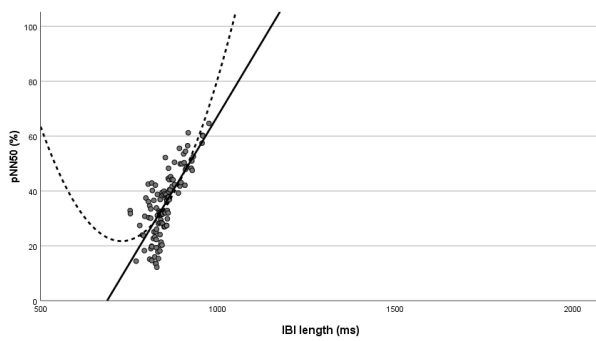

Relationship between pNN50 and IBI in a 12-year old girl. (Quadratic function:  $pNN50 = -1.172 \times IBI^2 + .001 \times IBI + 447.997$   $R^2 = .598$  linear function:  $pNN50 = .216 \times IBI - 148.558$   $R^2 = .568$ )

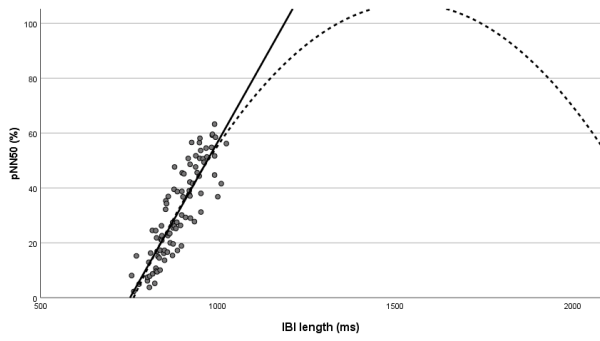

Relationship between pNN50 and IBI in a 12-year old boy. (Quadratic function:  $pNN50 = .545 \times IBI^2 + .000 \times IBI - 312.713$   $R^2 = .762$  linear function:  $pNN50 = .230 \times IBI - 172.683$   $R^2 = .760$ )

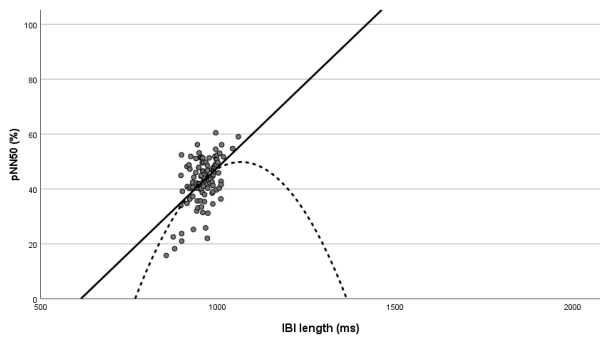

Relationship between pNN50 and IBI in a 14-year old girl. (Quadratic function:  $pNN50 = 1.193 \times IBI^2 - .001 \times IBI - 584.853$   $R^2 = .271$  linear function:  $pNN50 = .124 \times IBI - 76.162$   $R^2 = .257$ )



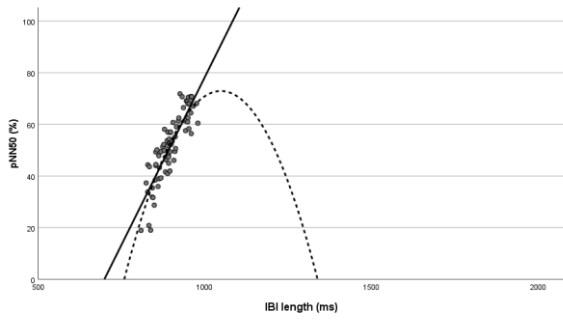

Relationship between pNN50 and IBI in a 16-year old girl. (Quadratic function:  $pNN50 = 1.819 \times IBI^2 - .001 \times IBI - 879.800$   $R^2 = .772$  linear function:  $pNN50 = .260 \times IBI - 181.470$   $R^2 = .756$ )

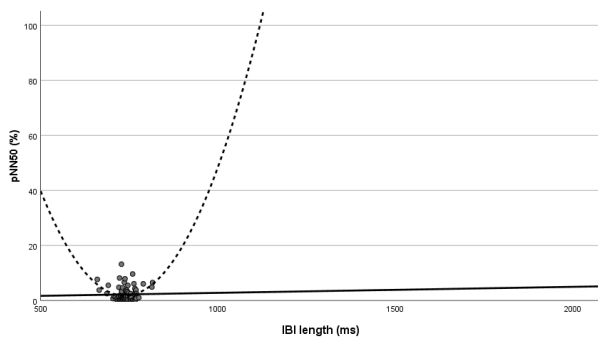

Relationship between pNN50 and IBI in a 14-year old girl. (Quadratic function:  $pNN50 = -.997 \times IBI^2 + .001 \times IBI + 369.286$   $R^2 = .112$  linear function:  $pNN50 = .002 \times IBI + .602$   $R^2 = .000$ )

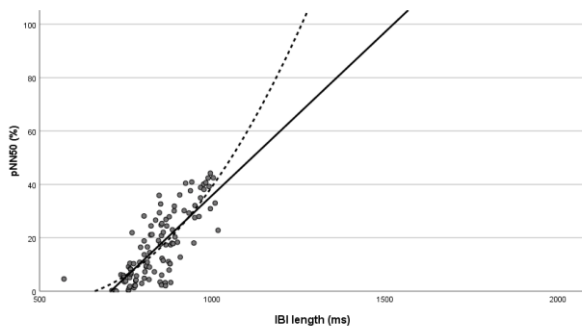

Relationship between pNN50 and IBI in a 15-year old girl. (Quadratic function:  $pNN50 = -.215 \times IBI^2 + .000 \times IBI + 54.932$   $R^2 = .625$  linear function:  $pNN50 = .122 \times IBI - 86.314$   $R^2 = .603$ )

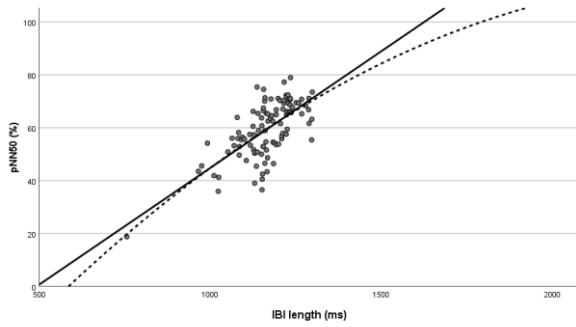

Relationship between pNN50 and IBI in a 15-year old girl. (Quadratic function:  $pNN50 = .159 \times IBI^2 - .000 \times IBI - 81.972$   $R^2 = .457$  linear function:  $pNN50 = .088 \times IBI - 43.427$   $R^2 = .455$ )

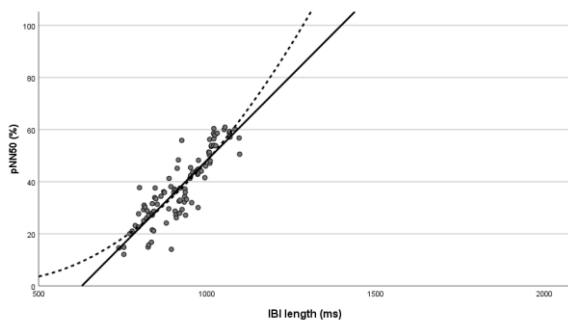

Relationship between pNN50 and IBI in a 13-year old girl. (Quadratic function:  $pNN50 = -.090 \times IBI^2 - .000 \times IBI - 18.874$   $R^2 = .771$  linear function:  $pNN50 = .130 \times IBI - 81.664$   $R^2 = .766$ )

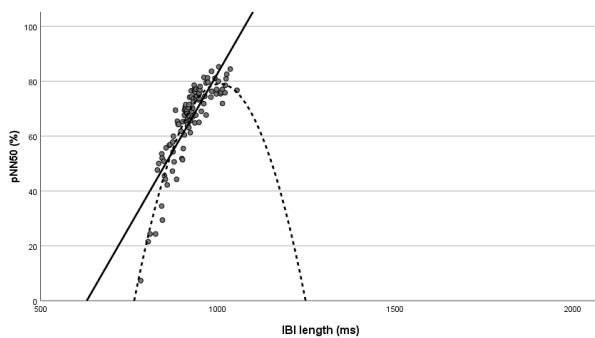

Relationship between pNN50 and IBI in a 15-year old boy. (Quadratic function:  $pNN50 = 2.723 \times IBI^2 - .001 \times IBI - 1289.238$   $R^2 = .859$  linear function:  $pNN50 = .225 \times IBI - 141.568$   $R^2 = .716$ )

Relationship between pNN50 and IBI in patients with anorexia nervosa at admission and during refeeding

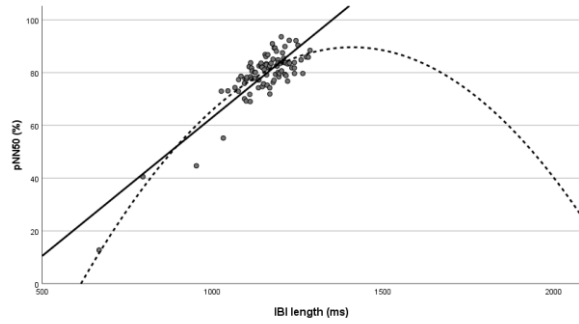

Relationship between pNN50 and IBI in a 12-year old girl with AN at admission. (Quadratic function:  $pNN50 = .399 \times IBI^2 + .000 \times IBI - 191.782$   $R^2 = .803$  linear function:  $pNN50 = .105 \times IBI - 42.152$   $R^2 = .738$ )

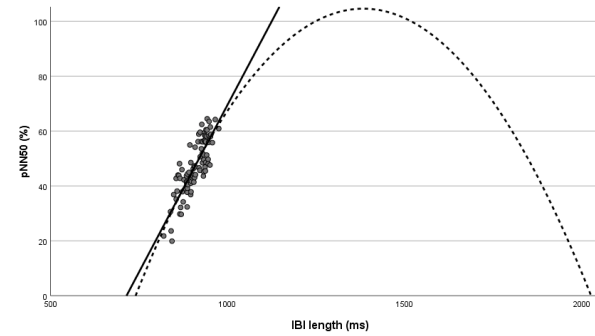

Relationship between pNN50 and IBI in a 12-year old girl with AN during refeeding. (Quadratic function:  $pNN50 = .700 \times IBI^2 + .000 \times IBI - 379.343$   $R^2 = .698$  linear function:  $pNN50 = .244 \times IBI - 174.259$   $R^2 = .697$ )

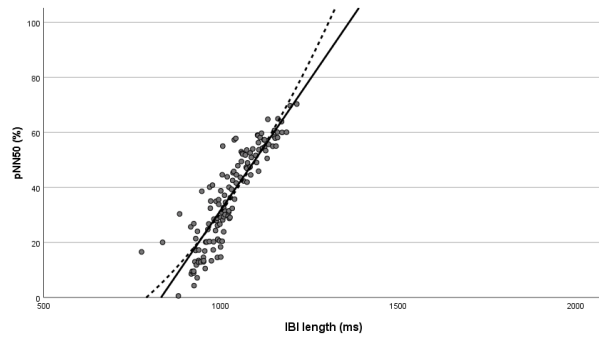

Relationship between pNN50 and IBI in a 13-year old girl with AN at admission. (Quadratic function:  $pNN50 = -.131 \times IBI^2 + .000 \times IBI - 6.491$   $R^2 = .786$  linear function:  $pNN50 = .189 \times IBI - 156.788$   $R^2 = .780$ )

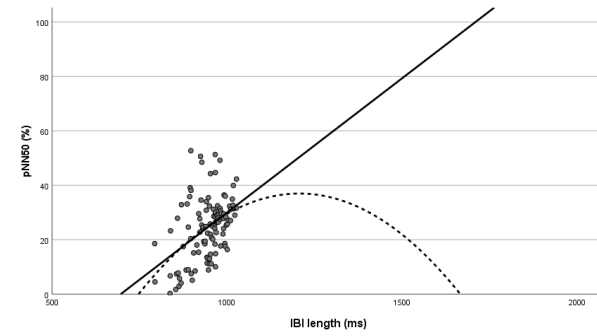

Relationship between pNN50 and IBI in a 13-year old girl with AN during refeeding. (Quadratic function:  $pNN50 = .422 \times IBI^2 + .000 \times IBI - 217.685$   $R^2 = .195$  linear function:  $pNN50 = .099 \times IBI - 68.656$   $R^2 = .193$ )

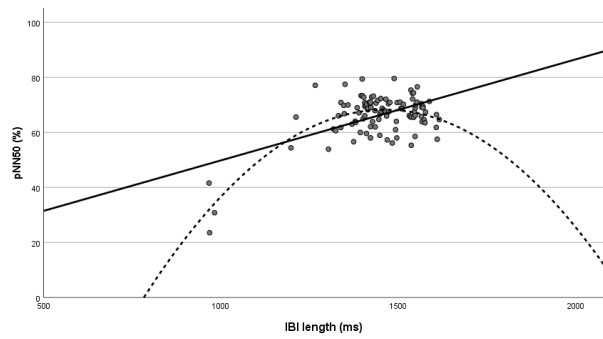

Relationship between pNN50 and IBI in a 14-year old girl with AN at admission. (Quadratic function:  $pNN50 = .432 \times IBI^2 + .000 \times IBI - 247.699$   $R^2 = .550$  linear function:  $pNN50 = .037 \times IBI + 13.141$   $R^2 = .290$ )

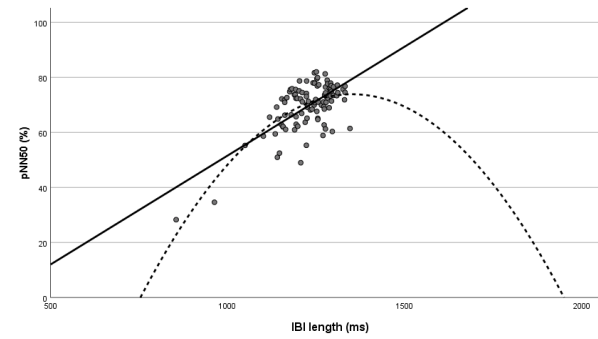

Relationship between pNN50 and IBI in a 14-year old girl with AN during refeeding. (Quadratic function:  $pNN50 = .559 \times IBI^2 + .000 \times IBI - 303.619$   $R^2 = .515$  linear function:  $pNN50 = .079 \times IBI - 27.580$   $R^2 = .436$ )

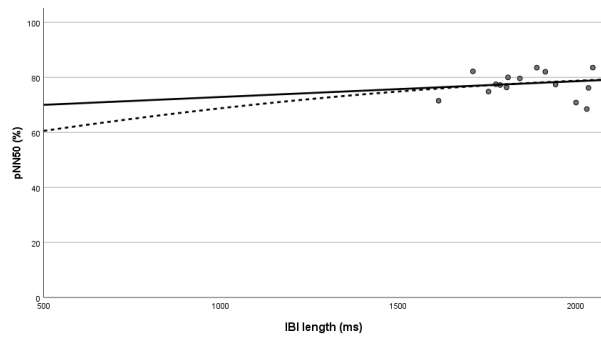

Relationship between pNN50 and IBI in a 14-year old girl with AN at admission. (Quadratic function:  $pNN50 = .023 \times IBI^2 + .000 \times IBI + 50.159$   $R^2 = .061$  linear function:  $pNN50 = .006 \times IBI + 67.166$   $R^2 = .060$ )

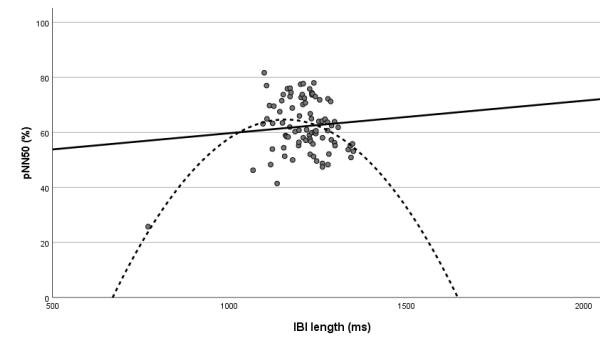

Relationship between pNN50 and IBI in a 14-year old girl with AN during refeeding. (Quadratic function:  $pNN50 = .630 \times IBI^2 + .000 \times IBI - 299.870$   $R^2 = .235$  linear function:  $pNN50 = .012 \times IBI + 47.934$   $R^2 = .009$ )

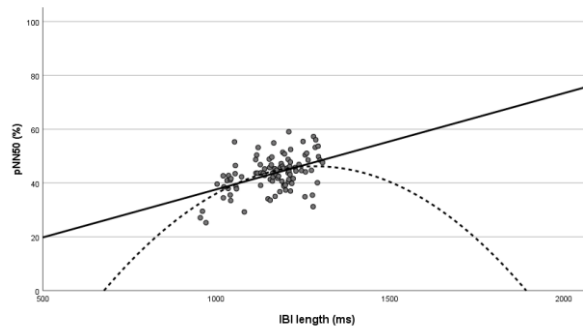

Relationship between pNN50 and IBI in a 13-year old girl with AN at admission. (Quadratic function:  $pNN50 = .321 \times IBI^2 + .000 \times IBI - 160.022$   $R^2 = .237$  linear function:  $pNN50 = .036 \times IBI + 1.885$   $R^2 = .212$ )

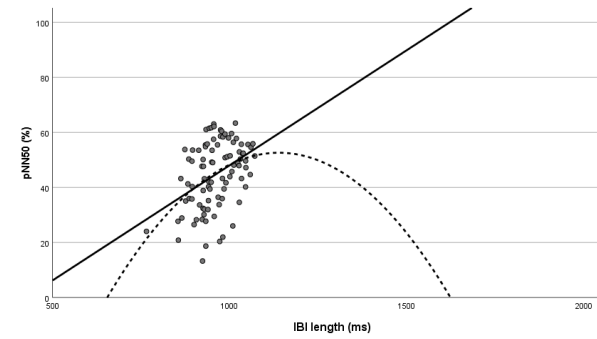

Relationship between pNN50 and IBI in a 13-year old girl with AN during refeeding. (Quadratic function:  $pNN50 = .510 \times IBI^2 + .000 \times IBI - 237.995$   $R^2 = .168$  linear function:  $pNN50 = .084 \times IBI - 35.608$   $R^2 = .160$ )

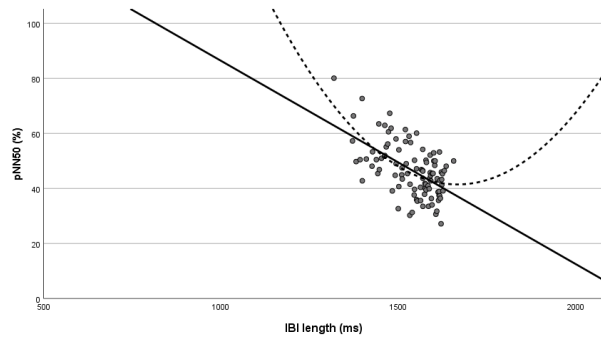

Relationship between pNN50 and IBI in a 16-year old girl with AN at admission. (Quadratic function:  $pNN50 = -.784 \times IBI^2 + .000 \times IBI + 694.792$   $R^2 = .342$  linear function:  $pNN50 = -.074 \times IBI + 160.266$   $R^2 = .321$ )

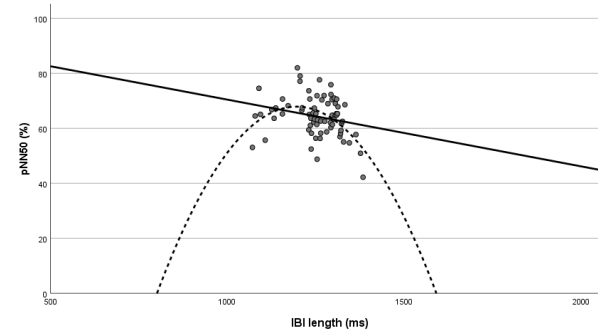

Relationship between pNN50 and IBI in a 16-year old girl with AN during refeeding. (Quadratic function:  $pNN50 = 1.042 \times IBI^2 + .000 \times IBI - 554.942$   $R^2 = .202$  linear function:  $pNN50 = -.024 \times IBI + 94.703$   $R^2 = .056$ )



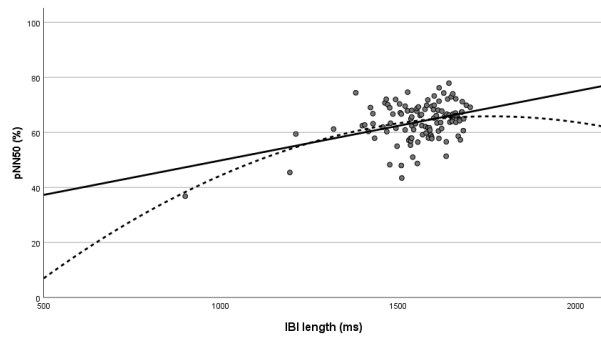

Relationship between pNN50 and IBI in a 13-year old girl with AN at admission. (Quadratic function:  $pNN50 = .130 \times IBI^2 + .000 \times IBI - 48.984$   $R^2 = .189$  linear function:  $pNN50 = -.025 \times IBI + 24.744$   $R^2 = .162$ )

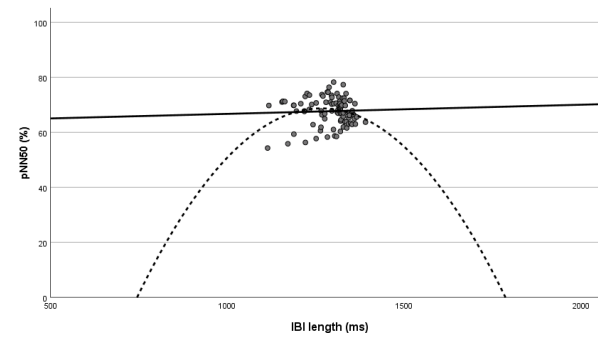

Relationship between pNN50 and IBI in a 13-year old girl with AN during refeeding. (Quadratic function:  $pNN50 = .642 \times IBI^2 + .000 \times IBI - 337.102$   $R^2 = .046$  linear function:  $pNN50 = -.003 \times IBI + 63.412$   $R^2 = .002$ )

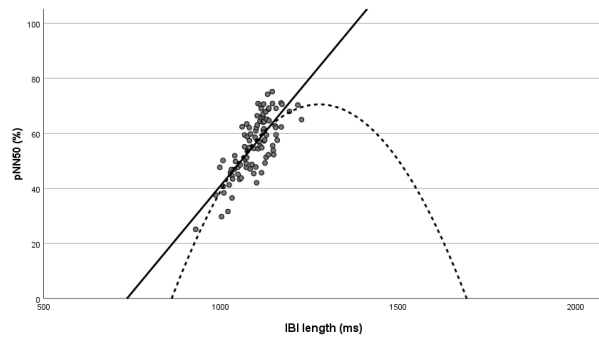

Relationship between pNN50 and IBI in a 13-year old girl with AN at admission. (Quadratic function:  $pNN50 = 1.042 \times IBI^2 + .000 \times IBI - 594.777$   $R^2 = .608$  linear function:  $pNN50 = .155 \times IBI - 114.223$   $R^2 = .583$ )

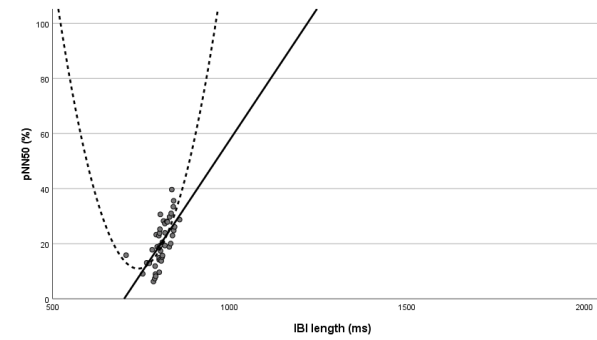

Relationship between pNN50 and IBI in a 13-year old girl with AN during refeeding. (Quadratic function:  $pNN50 = .642 \times IBI^2 + .000 \times IBI - 337.102$   $R^2 = .046$  linear function:  $pNN50 = -.003 \times IBI + 63.412$   $R^2 = .002$ )

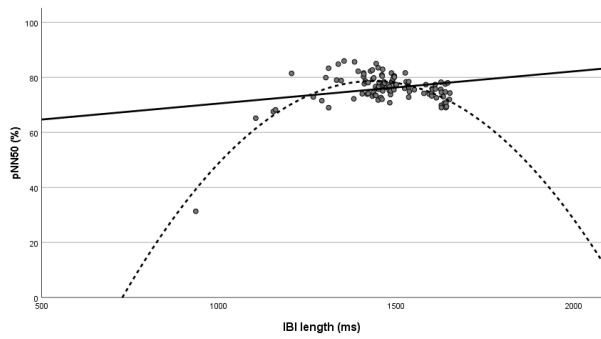

Relationship between pNN50 and IBI in a 13-year old girl with AN at admission. (Quadratic function:  $pNN50 = .451 \times IBI^2 + .000 \times IBI - 244.991$   $R^2 = .622$  linear function:  $pNN50 = .012 \times IBI + 58.843$   $R^2 = .057$ )

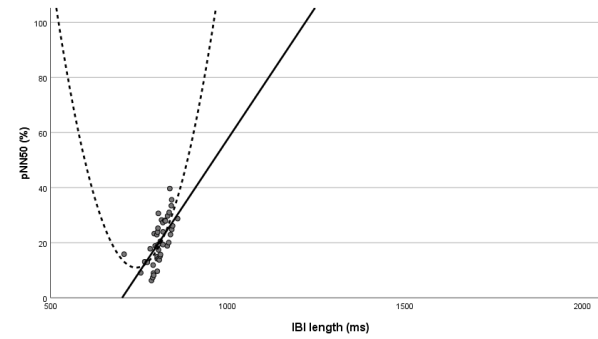

Relationship between pNN50 and IBI in a 13-year old girl with AN during refeeding. (Quadratic function:  $pNN50 = .642 \times IBI^2 + .000 \times IBI - 337.102$   $R^2 = .046$  linear function:  $pNN50 = -.003 \times IBI + 63.412$   $R^2 = .002$ )

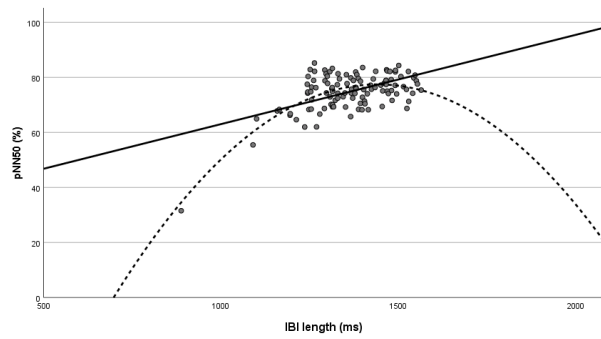

Relationship between pNN50 and IBI in a 14-year old girl with AN at admission. (Quadratic function:  $pNN50 = .403 \times IBI^2 + .000 \times IBI - 213.252$   $R^2 = .493$  linear function:  $pNN50 = .032 \times IBI + 30.581$   $R^2 = .284$ )

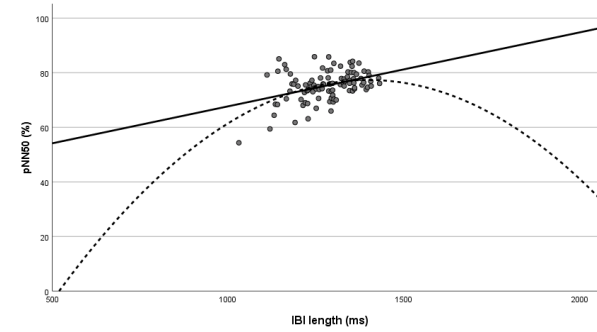

Relationship between pNN50 and IBI in a 14-year old girl with AN during refeeding. (Quadratic function:  $pNN50 = .280 \times IBI^2 + .000 \times IBI - 118.445$   $R^2 = .182$  linear function:  $pNN50 = .027 \times IBI + 40.583$   $R^2 = .159$ )

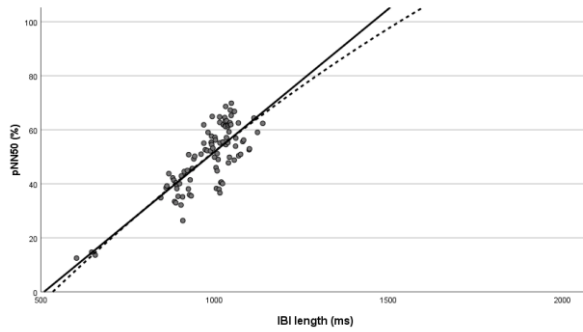

Relationship between pNN50 and IBI in a 12-year old girl with AN at admission. (Quadratic function:  $pNN50 = .144 \times IBI^2 + .000 \times IBI - 71.059$   $R^2 = .644$  linear function:  $pNN50 = .106 \times IBI - 53.865$   $R^2 = .643$ )

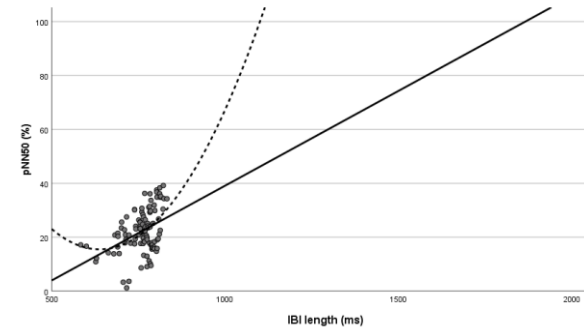

Relationship between pNN50 and IBI in a 12-year old girl with AN during refeeding. (Quadratic function:  $pNN50 = -.505 \times IBI^2 + .000 \times IBI + 176.566$   $R^2 = .198$  linear function:  $pNN50 = .070 \times IBI - 31.229$   $R^2 = .171$ )

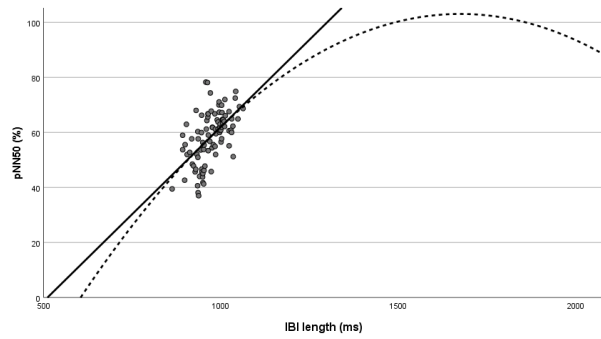

Relationship between pNN50 and IBI in a 15-year old girl with AN at admission. (Quadratic function:  $pNN50 = .301 \times IBI^2 + .000 \times IBI - 149.181$   $R^2 = .308$  linear function:  $pNN50 = .127 \times IBI - 64.806$   $R^2 = .307$ )

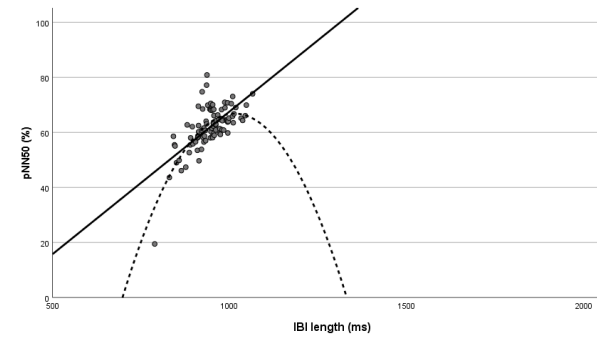

Relationship between pNN50 and IBI in a 15-year old girl with AN during refeeding. (Quadratic function:  $pNN50 = 1.353 \times IBI^2 - .001 \times IBI - 619.019$   $R^2 = .547$  linear function:  $pNN50 = .104 \times IBI - 36.078$   $R^2 = .441$ )

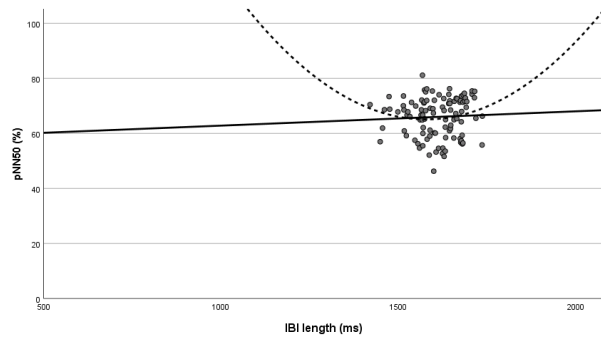

Relationship between pNN50 and IBI in a 16-year old boy with AN at admission. (Quadratic function:  $pNN50 = -.500 \times IBI^2 + .000 \times IBI - 459.392$   $R^2 = .019$  linear function:  $pNN50 = .005 \times IBI + 57.631$   $R^2 = .002$ )

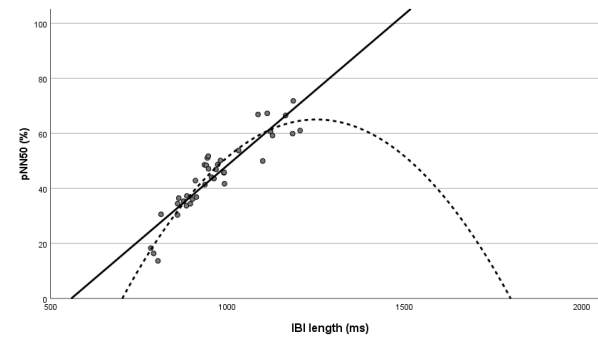

Relationship between pNN50 and IBI in a 16-year old boy with AN during refeeding. (Quadratic function:  $pNN50 = .541 \times IBI^2 + .000 \times IBI - 273.430$   $R^2 = .889$  linear function:  $pNN50 = .110 \times IBI - 61.313$   $R^2 = .840$ )

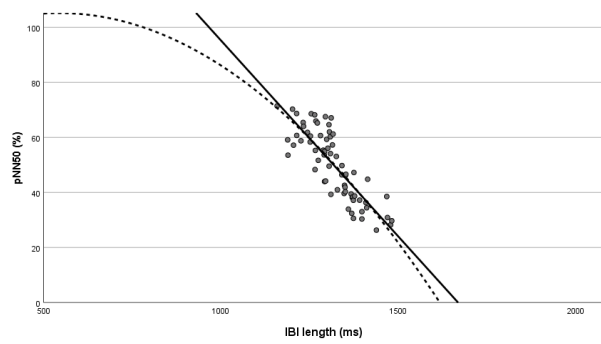

Relationship between pNN50 and IBI in a 14-year old girl with AN at admission. (Quadratic function:  $pNN50 = .099 \times IBI^2 + .000 \times IBI + 78.331$   $R^2 = .691$  linear function:  $pNN50 = -.143 \times IBI + 237.726$   $R^2 = .689$ )

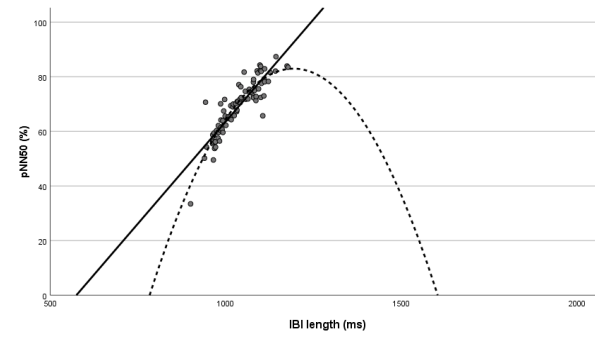

Relationship between pNN50 and IBI in a 14-year old girl with AN during refeeding. (Quadratic function:  $pNN50 = 1.178 \times IBI^2 + .000 \times IBI - 619.448$   $R^2 = .827$  linear function:  $pNN50 = .150 \times IBI - 85.944$   $R^2 = .790$ )



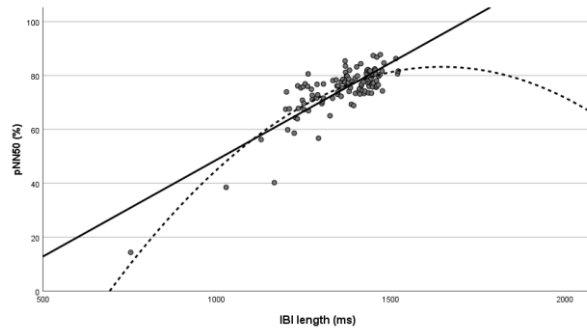

Relationship between pNN50 and IBI in a 16-year old girl with AN at admission. (Quadratic function:  $pNN50 = .301 \times IBI^2 - .000 \times IBI - 164.468$   $R^2 = .736$  linear function:  $pNN50 = .072 \times IBI - 23.164$   $R^2 = .665$ )

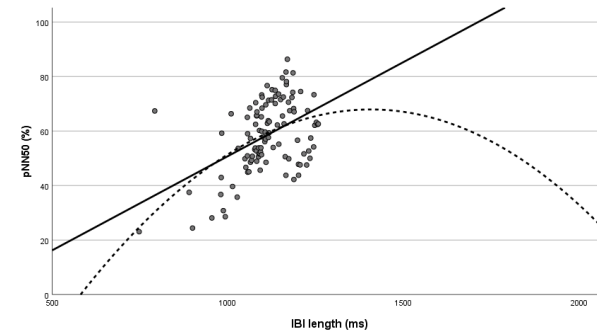

Relationship between pNN50 and IBI in a 16-year old girl with AN during refeeding. (Quadratic function:  $pNN50 = .280 \times IBI^2 - .000 \times IBI - 129.086$   $R^2 = .232$  linear function:  $pNN50 = .069 \times IBI - 18.304$   $R^2 = .219$ )

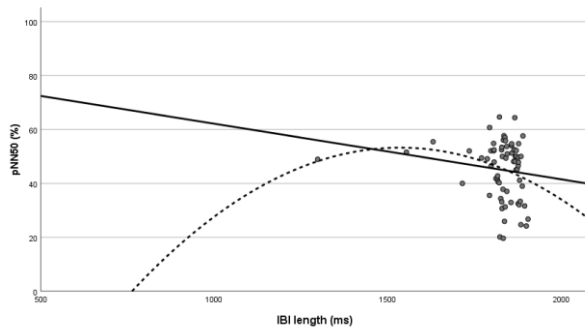

Relationship between pNN50 and IBI in a 16-year old girl with AN at admission. (Quadratic function:  $pNN50 = .274 \times IBI^2 - .000 \times IBI - 157.102$   $R^2 = .049$  linear function:  $pNN50 = -.021 \times IBI - 82.746$   $R^2 = .028$ )

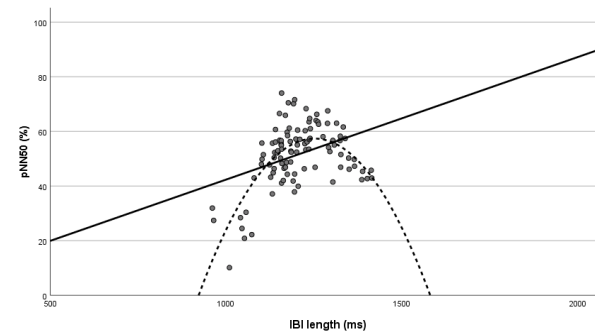

Relationship between pNN50 and IBI in a 15-year old girl with AN during refeeding. (Quadratic function:  $pNN50 = 1.324 \times IBI^2 - .001 \times IBI - 770.840$   $R^2 = .483$  linear function:  $pNN50 = .045 \times IBI - 2.490$   $R^2 = .140$ )

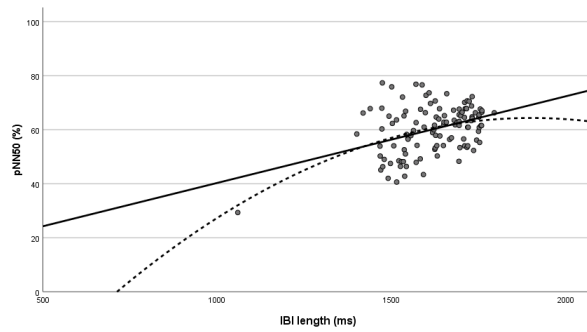

Relationship between pNN50 and IBI in a 16-year old girl with AN at admission. (Quadratic function:  $pNN50 = .173 \times IBI^2 - .000 \times IBI - 100.176$   $R^2 = .174$  linear function:  $pNN50 = .032 \times IBI + 8.211$   $R^2 = .157$ )

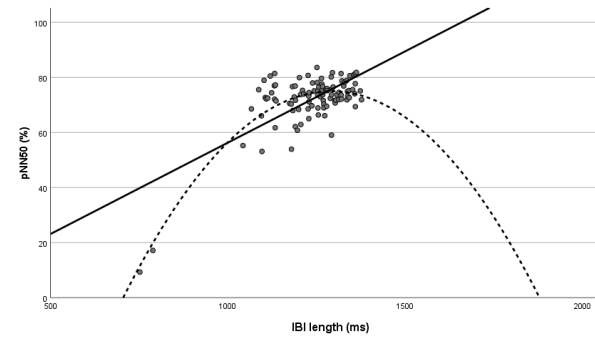

Relationship between pNN50 and IBI in a 16-year old girl with AN during refeeding. (Quadratic function:  $pNN50 = .562 \times IBI^2 + .000 \times IBI - 288.037$   $R^2 = .689$  linear function:  $pNN50 = .066 \times IBI - 10.025$   $R^2 = .454$ )

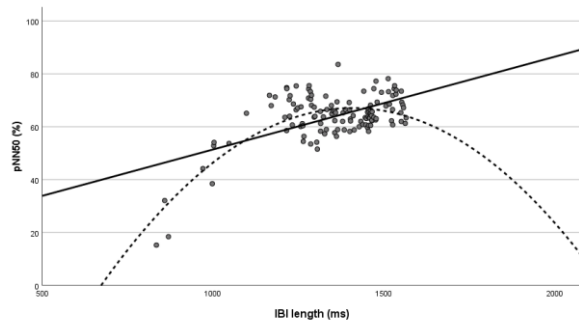

Relationship between pNN50 and IBI in a 15-year old girl with AN at admission. (Quadratic function:  $pNN50 = .349 \times IBI^2 + .000 \times IBI - 178.776$   $R^2 = .528$  linear function:  $pNN50 = .035 \times IBI + 16.306$   $R^2 = .320$ )

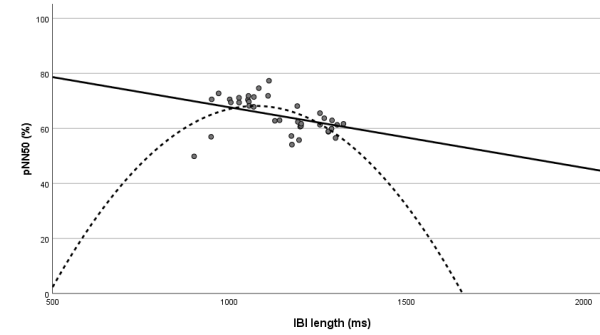

Relationship between pNN50 and IBI in a 15-year old girl with AN during refeeding. (Quadratic function:  $pNN50 = .430 \times IBI^2 + .000 \times IBI - 162.444$   $R^2 = .324$  linear function:  $pNN50 = -.022 \times IBI + 89.633$   $R^2 = .163$ )

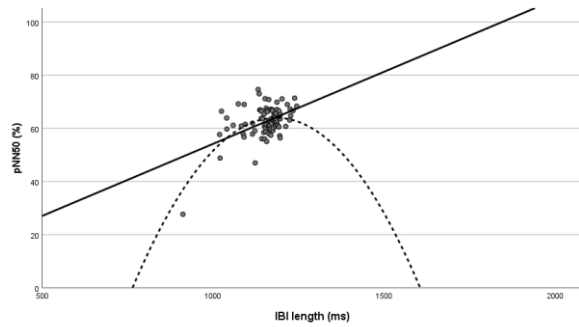

Relationship between pNN50 and IBI in a 13-year old girl with AN at admission. (Quadratic function:  $pNN50 = .858 \times IBI^2 + .000 \times IBI - 443.914$   $R^2 = .336$  linear function:  $pNN50 = .054 \times IBI - .116$   $R^2 = .235$ )

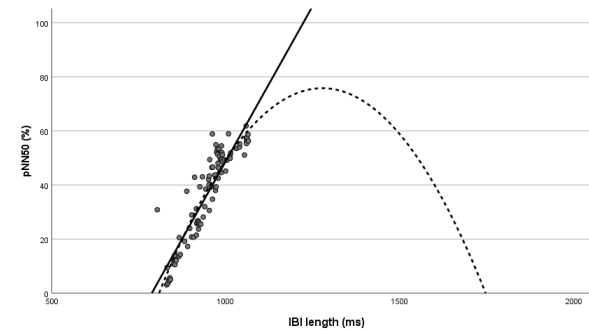

Relationship between pNN50 and IBI in a 15-year old girl with AN during refeeding. (Quadratic function:  $pNN50 = .880 \times IBI^2 + .000 \times IBI - 485.876$   $R^2 = .843$  linear function:  $pNN50 = .230 \times IBI - 180.849$   $R^2 = .823$ )

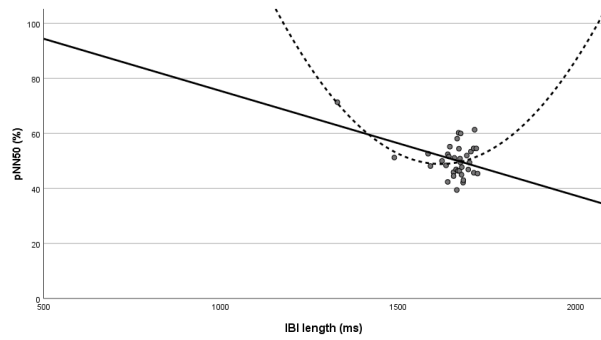

Relationship between pNN50 and IBI in a 13-year old boy with AN at admission. (Quadratic function:  $pNN50 = -.843 \times IBI^2 + .000 \times IBI + 731.506$   $R^2 = .328$  linear function:  $pNN50 = -.038 \times IBI + 113.406$   $R^2 = .181$ )

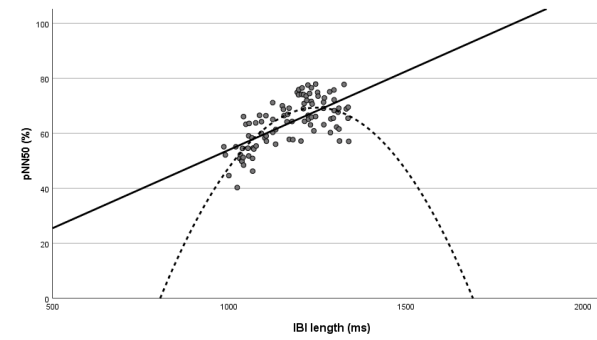

Relationship between pNN50 and IBI in a 13-year old boy with AN during refeeding. (Quadratic function:  $pNN50 = .885 \times IBI^2 + .000 \times IBI - 481.796$   $R^2 = .570$  linear function:  $pNN50 = .057 \times IBI - 3.071$   $R^2 = .440$ )
